# Supplementary material for: Short-Chain Fatty Acids Ameliorate Depressive-like Behaviors of High Fructose-Fed Mice by Rescuing Hippocampal Neurogenesis Decline and Blood–Brain Barrier Damage
Source: MDPI journal article supplement (doi:10.3390/nu14091882), 2022-04-29
Supplement: s1 [file s1]

Supplementary Materials

# SCFAs Enhance Stress Resilience of Mice Fed by High-Fructose Diet through Improving Hippocampal Neurogenesis Decline and Blood–Brain Barrier Damage

Chuan-Feng Tang<sup>1</sup>, Cong-Ying Wang<sup>1</sup>, Jun-Han Wang<sup>1</sup>, Qiao-Na Wang<sup>1</sup>, Shen-Jie Li<sup>2</sup>, Han-Ou Wang<sup>2</sup>, Feng Zhou<sup>2,\*</sup> and Jian-Mei Li<sup>1,\*</sup>

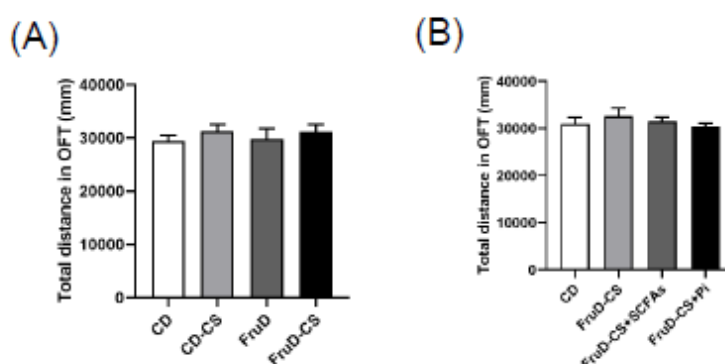

**Figure S1.** FruD, chronic stress or SCFAs supplementation failed to change the spontaneous activity of mice in OFT. Total distance of mice in OFT. **A,B**
